# Supplementary material for: Essential Oil of Mentha aquatica var. Kenting Water Mint Suppresses Two-Stage Skin Carcinogenesis Accelerated by BRAF Inhibitor Vemurafenib
Source: PubMed Central journal article supplement (PMC6630265; doi:10.3390/molecules24122344), 2019-06-25

# Supplementary Figure 1

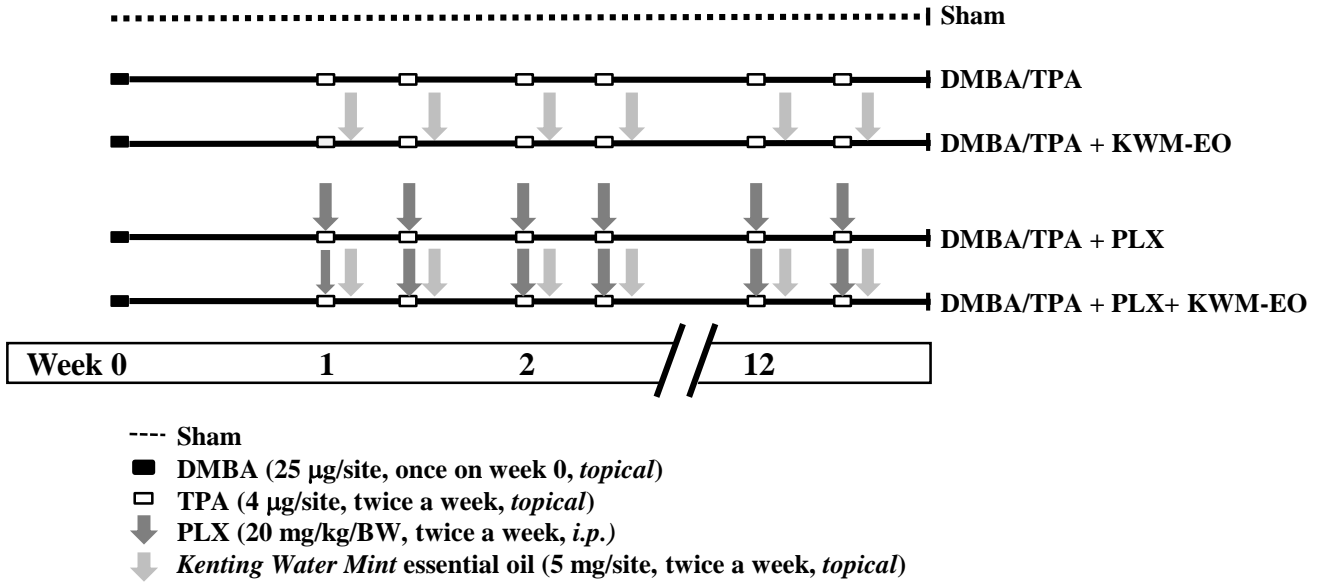

# Supplementary Figure 2

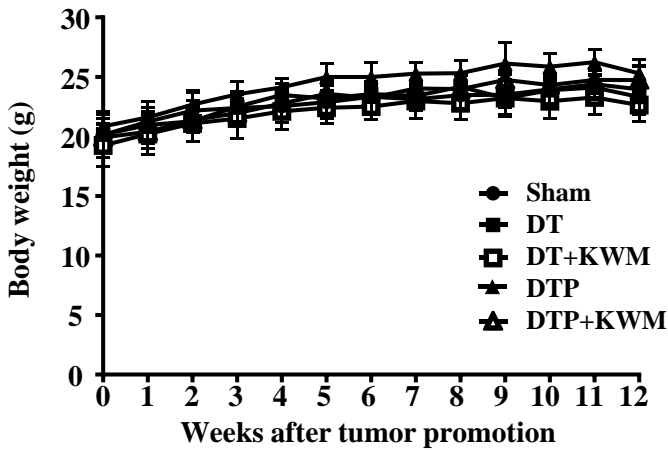

Supplement: molecules-24-02344-s001.pdf [file molecules-24-02344-s001.pdf]
